# Supplementary material
Source: PubMed Central journal article supplement (PMC5654522)

Supplemental Figure 1. Template without helix numbering

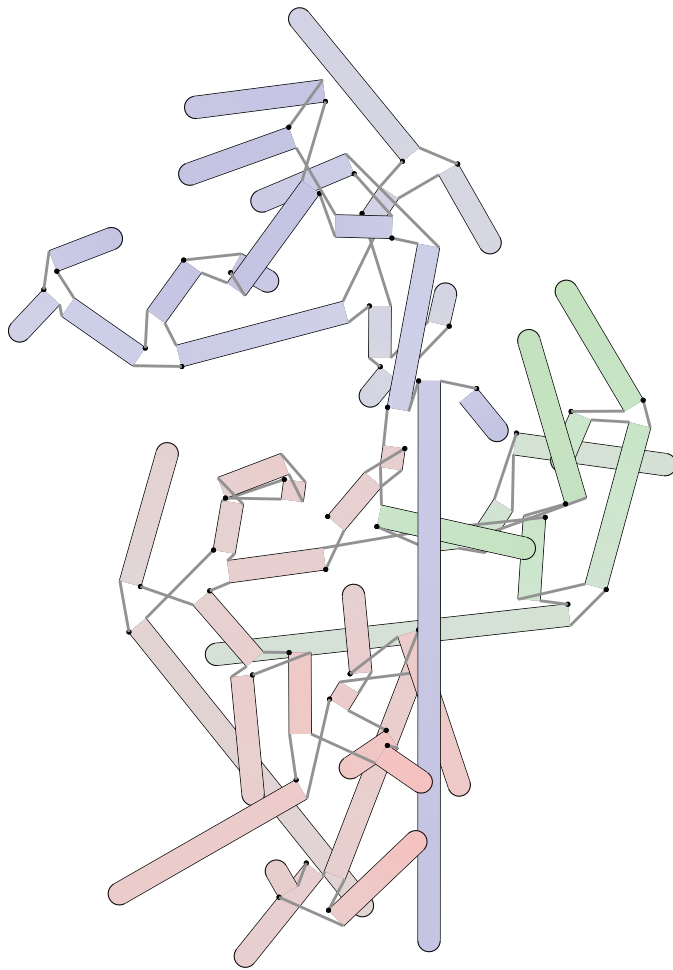

Supplement: NIHMS899746-supplement-supp1.pdf [file NIHMS899746-supplement-supp1.pdf]

Supplemental Figure 1. Template with helix numbering

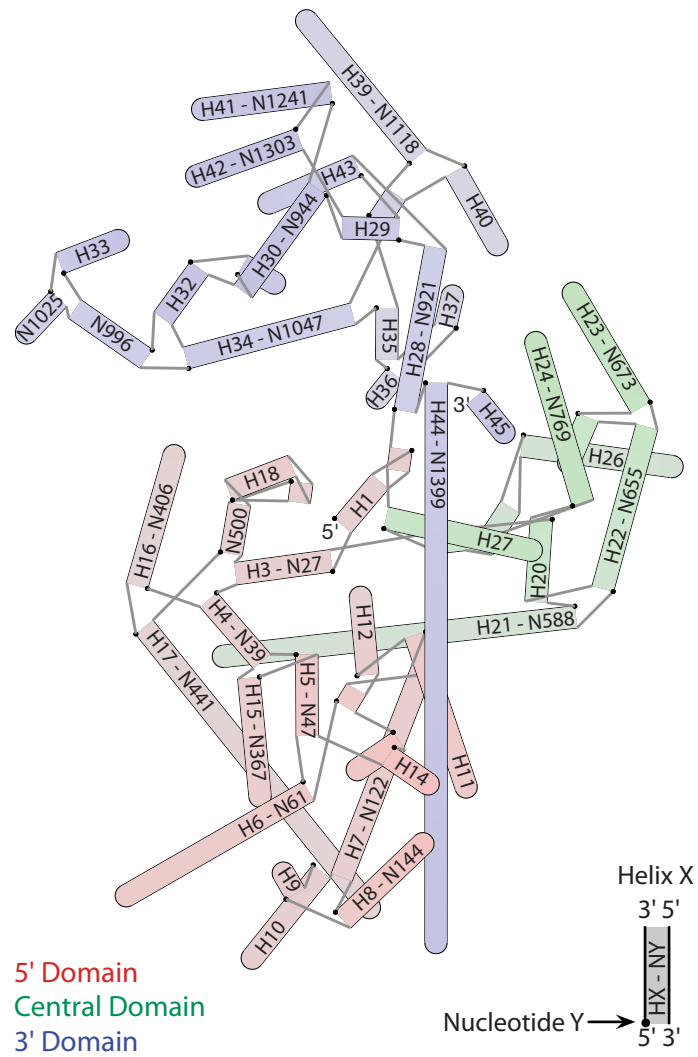

Supplement: NIHMS899746-supplement-supp1a.pdf [file NIHMS899746-supplement-supp1a.pdf]
